# Supplementary material for: Atmospheric histories and emissions of chlorofluorocarbons CFC-13 (CClF 3 ), ΣCFC-114 (C 2 Cl 2 F 4 ), and CFC-115 (C 2 ClF 5 )
Source: Copernicus journal article supplement (doi:10.5194/acp-18-979-2018), 2018-01-25
Supplement: Supplementary file 1 [file acp-18-979-2018-supplement.zip]

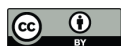

## *Supplement of*

# **Atmospheric histories and emissions of chlorofluorocarbons CFC-13 (CClF<sub>3</sub>), $\Sigma$ CFC-114 (C<sub>2</sub>Cl<sub>2</sub>F<sub>4</sub>), and CFC-115 (C<sub>2</sub>ClF<sub>5</sub>)**

**Martin K. Vollmer et al.**

*Correspondence to:* Martin K. Vollmer (martin.vollmer@empa.ch)

- acp-18-979-2018-supplement-title-page.pdf
- Supplement
  - VollmerSupplement.pdf
  - VollmerTableS1-FirnAirResults.csv
  - VollmerTableS2-CGAAs.csv
  - VollmerTableS3-NH\_archive.csv
  - VollmerTableS4-SH\_archive.csv
  - VollmerTableS5-KingSejong.csv
  - VollmerTableS6-Bristol-Abundances.csv
  - VollmerTableS7-Bristol-Emissions.csv
  - VollmerTableS8-CSIRO-Inversion.csv
  - VollmerTableS9-AFEAS\_Data.csv

The copyright of individual parts of the supplement might differ from the CC BY 4.0 License.
